# Supplementary material for: Association between severity of illicit drug dependence and quality of life in a psychosocial care center in BRAZIL: cross-sectional study
Source: PubMed Central journal article supplement (PMC5693571; doi:10.1186/s12955-017-0795-5), 2017-11-17
Supplement: 12955_2017_795_MOESM2_ESM.pdf [file 12955_2017_795_MOESM2_ESM.pdf]

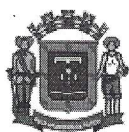

Prefeitura  
Municipal  
de Goiânia

## SECRETARIA MUNICIPAL DE SAÚDE

Goiânia, 13 de agosto de 2014

### DECLARAÇÃO DE ANUÊNCIA

Declaro ter lido e concordar com o projeto de pesquisa “**QUALIDADE DE VIDA DOS USUÁRIOS DE ÁLCOOL E DROGAS ATENDIDOS NO CAPS AD CASA DE GOIÂNIA**” sob responsabilidade da pesquisadora **SELVA RIOS CAMPÊLO** e declaro conhecer e cumprir as Resoluções Éticas Brasileiras, em especial a Resolução CNS 466/2012. Esta instituição está ciente de suas responsabilidades como instituição coparticipante do presente projeto de pesquisa e de seu compromisso no resguardo da segurança e bem-estar de sujeitos de pesquisa nela recrutados, dispondo de infraestrutura necessária para a garantia de tal segurança e bem-estar. Estou ciente que a execução deste projeto dependerá da aprovação do mesmo pelo CEP da instituição proponente, mediante parecer ético consubstanciado e declaração de aprovação.

  
SECRETARIA MUNICIPAL DE SAÚDE  
DCTES/ ESCOLA MUNICIPAL DE SAÚDE PÚBLICA  
Cristiane Oliveira C. de Albuquerque  
Diretora  
Decreto nº 793/2014

---

**Cristiane Oliveira Cavalcante de Albuquerque**  
Secretaria Municipal de Saúde de Goiânia  
Decreto 793/2014
